# Supplementary material for: Tracking auditory mismatch negativity responses during full conscious state and coma
Source: PubMed Central journal article supplement (PMC10036371; doi:10.3389/fneur.2023.1111691), 2023-03-10
Supplement: Data_Sheet_1.pdf [file Data_Sheet_1.pdf]

## Supplementary Material

**Table S1.** Effect size of permutation *t*-test (Cohen's *d*) and Bayes factors (BF10) from the healthy control group across blocks

| Deviant   | Block | MMN              |       | P3a              |       |
|-----------|-------|------------------|-------|------------------|-------|
|           |       | Cohen's <i>d</i> | BF10  | Cohen's <i>d</i> | BF10  |
| Duration  | 1     | 1.29             | > 100 | 2.02             | > 100 |
|           | 2     | 1.59             | > 100 | 2.49             | > 100 |
|           | 3     | 1.43             | > 100 | 2.48             | > 100 |
|           | 4     | 1.05             | > 100 | 1.66             | > 100 |
|           | 5     | 1.04             | > 100 | 2.62             | > 100 |
| Frequency | 1     | 1.08             | > 100 | 1.37             | > 100 |
|           | 2     | 0.70             | > 100 | 1.58             | > 100 |
|           | 3     | 0.72             | > 100 | 1.06             | 72.9  |
|           | 4     | 0.76             | > 100 | 1.51             | > 100 |
|           | 5     | 0.73             | > 100 | 1.45             | > 100 |
| Intensity | 1     | 1.12             | > 100 | 1.42             | > 100 |
|           | 2     | 1.04             | > 100 | 2.15             | > 100 |
|           | 3     | 1.26             | > 100 | 1.38             | > 100 |
|           | 4     | 1.19             | > 100 | 1.37             | > 100 |
|           | 5     | 1.13             | > 100 | 1.24             | 50.41 |

**Table S2.** Summary of the P3a results in Patient 1. + indicates a positive result, - a negative result. For Bayes column, + anecdotal evidence; ++ moderate evidence; +++ strong evidence and ++++ very strong to extreme evidence

| DAY 0                                              |      |       |          | DURATION |           |       | FREQUENCY |           |       | INTENSITY |           |       |   |
|----------------------------------------------------|------|-------|----------|----------|-----------|-------|-----------|-----------|-------|-----------|-----------|-------|---|
| GCS                                                | FOUR | Block | Time     | Visual   | Perm.test | Bayes | Visual    | Perm.test | Bayes | Visual    | Perm.test | Bayes |   |
| 5                                                  | 6    | 1     | 18:35 PM | -        | -         | -     | -         | -         | -     | +         | +         | ++++  |   |
|                                                    |      | 2     | 21:10 PM | +        | -         | -     | -         | -         | -     | +         | -         | +     |   |
|                                                    |      | 3     | 22:49 PM | -        | -         | -     | -         | -         | -     | -         | -         | -     | - |
|                                                    |      | 4     | 12:47 AM | -        | -         | -     | +         | -         | +++   | +         | +         | ++++  |   |
|                                                    |      | 5     | 06:26 AM | +        | -         | -     | -         | -         | -     | -         | -         | -     | - |
|                                                    |      | 6     | 07:58 AM | +        | -         | +     | -         | -         | -     | -         | +         | -     | - |
|                                                    |      | 7     | 10:08 AM | -        | -         | -     | -         | -         | -     | -         | -         | -     | - |
|                                                    |      | 8     | 11:26 AM | +        | -         | -     | ++        | +         | -     | -         | -         | -     | - |
| DAY 3                                              |      |       |          | DURATION |           |       | FREQUENCY |           |       | INTENSITY |           |       |   |
| GCS                                                | FOUR | Block | Time     | Visual   | Perm.test | Bayes | Visual    | Perm.test | Bayes | Visual    | Perm.test | Bayes |   |
| 6                                                  | 8    | 1     | 18:20 PM | -        | -         | +     | -         | -         | -     | +         | -         | +     |   |
|                                                    |      | 2     | 20:29 PM | +        | +         | ++    | +         | -         | -     | +         | +         | ++++  |   |
|                                                    |      | 3     | 21:15 PM | +        | -         | -     | +         | -         | -     | +         | +         | ++++  |   |
|                                                    |      | 4     | 23:14 PM | -        | -         | -     | +         | -         | -     | -         | -         | -     |   |
|                                                    |      | 5     | 01:05 AM | +        | -         | -     | -         | -         | -     | -         | -         | -     |   |
|                                                    |      | 6     | 03:13 AM | +        | +         | ++++  | +         | +         | +++   | +         | +         | ++++  |   |
|                                                    |      | 7     | 05:22 AM | +        | -         | ++    | +         | -         | -     | +         | -         | -     |   |
|                                                    |      | 8     | 06:09 AM | -        | -         | -     | -         | -         | -     | +         | +         | +++   |   |
|                                                    |      | 9     | 07:56 AM | +        | +         | ++++  | +         | +         | ++    | +         | +         | ++    |   |
|                                                    |      | 10    | 10:11 AM | +        | +         | +++   | +         | -         | +     | +         | +         | ++++  |   |
| <b>OUTCOME: Death (withdrawal of life support)</b> |      |       |          |          |           |       |           |           |       |           |           |       |   |

**Supplementary Material**

**Table S3.** Summary of the P3a results in Patient 2. + indicates a positive result, - a negative result. For Bayes column, + anecdotal evidence; ++ moderate evidence; +++ strong evidence and ++++ very strong to extreme evidence

| DAY 0 |      |       |          | DURATION |            |       | FREQUENCY |            |       | INTENSITY |            |       |
|-------|------|-------|----------|----------|------------|-------|-----------|------------|-------|-----------|------------|-------|
| GCS   | FOUR | Block | Time     | Visual   | Perm. test | Bayes | Visual    | Perm. test | Bayes | Visual    | Perm. test | Bayes |
| 5     | 5    | 1     | 21:15 PM | -        | -          | -     | -         | -          | -     | -         | -          | -     |
|       |      | 2     | 12:14 AM | -        | -          | -     | +         | -          | -     | -         | -          | -     |
|       |      | 3     | 02:24 AM | +        | -          | -     | +         | -          | -     | +         | +          | ++++  |
|       |      | 4     | 4:51 AM  | -        | -          | -     | +         | -          | -     | +         | -          | +     |
|       |      | 5     | 07:00 AM | -        | -          | -     | -         | -          | -     | -         | -          | -     |
|       |      | 6     | 08:00 AM | +        | -          | -     | +         | -          | -     | -         | -          | -     |
|       |      | 7     | 10:09 AM | -        | -          | -     | -         | -          | -     | +         | +          | +++   |
|       |      | 8     | 11:48 AM | -        | -          | -     | +         | -          | -     | -         | -          | -     |
|       |      | 9     | 12:28 AM | +        | -          | -     | +         | -          | -     | -         | -          | -     |
|       |      | 10    | 02:37 PM | -        | -          | -     | -         | -          | -     | -         | -          | -     |

  

| DAY 3 |      |       |          | DURATION |            |       | FREQUENCY |            |       | INTENSITY |            |       |
|-------|------|-------|----------|----------|------------|-------|-----------|------------|-------|-----------|------------|-------|
| GCS   | FOUR | Block | Time     | Visual   | Perm. test | Bayes | Visual    | Perm. test | Bayes | Visual    | Perm. test | Bayes |
| 9     | 9    | 1     | 18:34 PM | +        | +          | +++   | -         | -          | -     | -         | -          | -     |
|       |      | 2     | 20:48 PM | +        | +          | ++    | -         | -          | -     | +         | -          | -     |

**OUTCOME: Good recovery**

**Table S4.** Summary of the P3a results in Patient 3. + indicates a positive result, - a negative result. For Bayes column, + anecdotal evidence; ++ moderate evidence; +++ strong evidence and ++++ very strong to extreme evidence

| DAY 0 |      |       |          | DURATION |            |       | FREQUENCY |            |       | INTENSITY |            |       |
|-------|------|-------|----------|----------|------------|-------|-----------|------------|-------|-----------|------------|-------|
| GCS   | FOUR | Block | Time     | Visual   | Perm. test | Bayes | Visual    | Perm. test | Bayes | Visual    | Perm. test | Bayes |
| 4     | 5    | 1     | 14:52 PM | +        | -          | +     | -         | -          | -     | +         | -          | ++    |
|       |      | 2     | 16:44 PM | -        | -          | -     | +         | -          | -     | +         | -          | -     |
|       |      | 3     | 18:46 PM | -        | -          | -     | +         | -          | -     | -         | -          | -     |
|       |      | 4     | 20:55 PM | -        | -          | -     | -         | -          | -     | +         | -          | -     |
|       |      | 5     | 21:36 PM | +        | -          | -     | -         | -          | -     | +         | -          | -     |
|       |      | 6     | 23:25 PM | +        | -          | -     | -         | -          | -     | -         | -          | -     |
|       |      | 7     | 01:34 AM | -        | -          | -     | +         | -          | -     | +         | +          | ++    |
|       |      | 8     | 02:10 AM | -        | -          | -     | +         | +          | ++    | +         | +          | ++    |
|       |      | 9     | 05:24 AM | -        | -          | -     | -         | -          | -     | -         | -          | -     |
|       |      | 10    | 07:09 AM | -        | -          | -     | -         | -          | -     | -         | -          | -     |

  

| DAY 3 |      |       |          | DURATION |            |       | FREQUENCY |            |       | INTENSITY |            |       |   |
|-------|------|-------|----------|----------|------------|-------|-----------|------------|-------|-----------|------------|-------|---|
| GCS   | FOUR | Block | Time     | Visual   | Perm. test | Bayes | Visual    | Perm. test | Bayes | Visual    | Perm. test | Bayes |   |
| 7     | 5    | 1     | 20:46 PM | -        | -          | -     | +         | -          | -     | +         | -          | ++    |   |
|       |      | 2     | 21:45 PM | +        | +          | ++++  | +         | +          | ++++  | -         | -          | -     |   |
|       |      | 3     | 23:29 PM | -        | -          | -     | +         | -          | -     | -         | -          | -     |   |
|       |      | 4     | 01:38 AM | -        | -          | -     | -         | -          | -     | -         | -          | -     |   |
|       |      | 5     | 04:33 AM | -        | -          | -     | -         | -          | -     | -         | +          | -     | + |
|       |      | 6     | 06:21 AM | -        | -          | -     | -         | -          | -     | -         | -          | -     | - |

**OUTCOME: UWS**

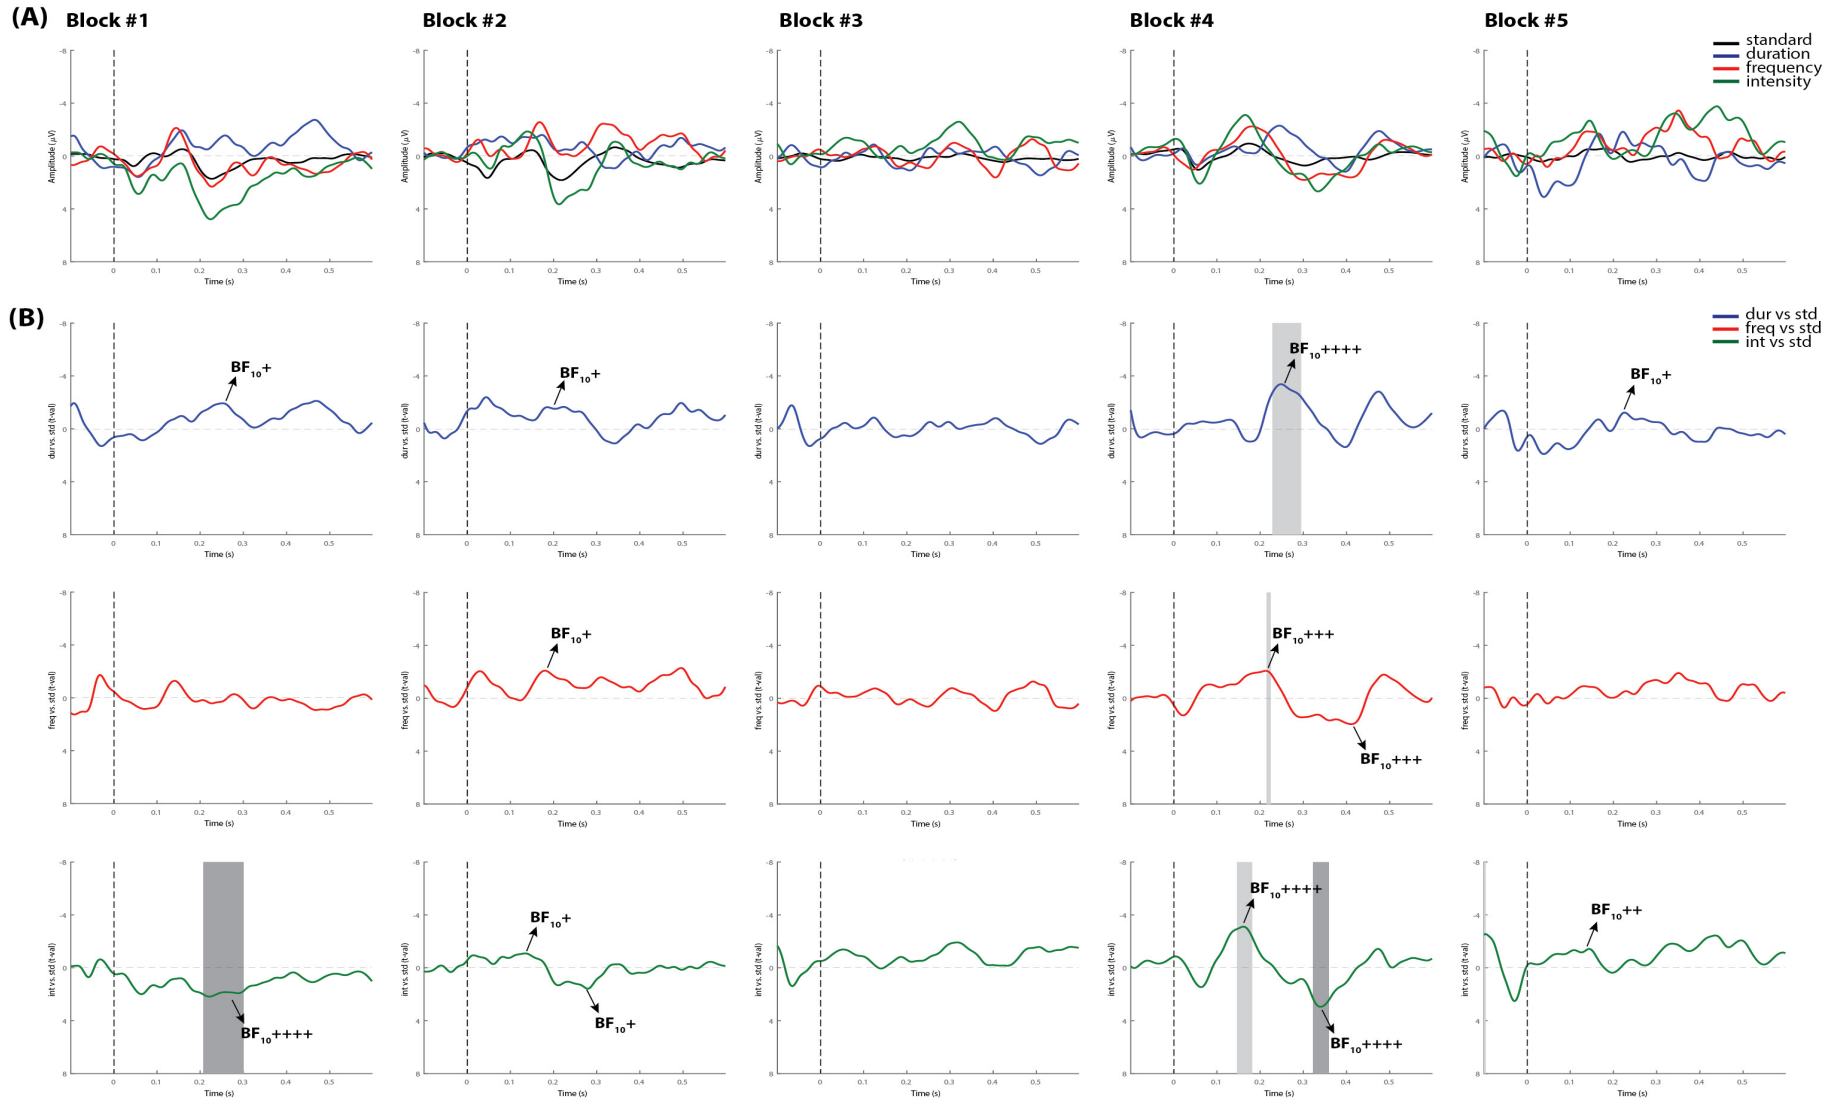

**Figure S1.** Individual ERPs and statistical findings of Patient 1 on day 0. (A) Individual ERPs across blocks. (B) Time course of the difference between deviants and standard stimuli expressed in units of  $t$ -values. Significant intervals for negative components are denoted by a light gray area, and those for positive components are denoted by a dark gray area. Black arrows show the latency of maximum Bayes factors and the strength of evidence for  $H_1$ : + anecdotal; ++ moderate; +++ strong and ++++ very strong to extreme

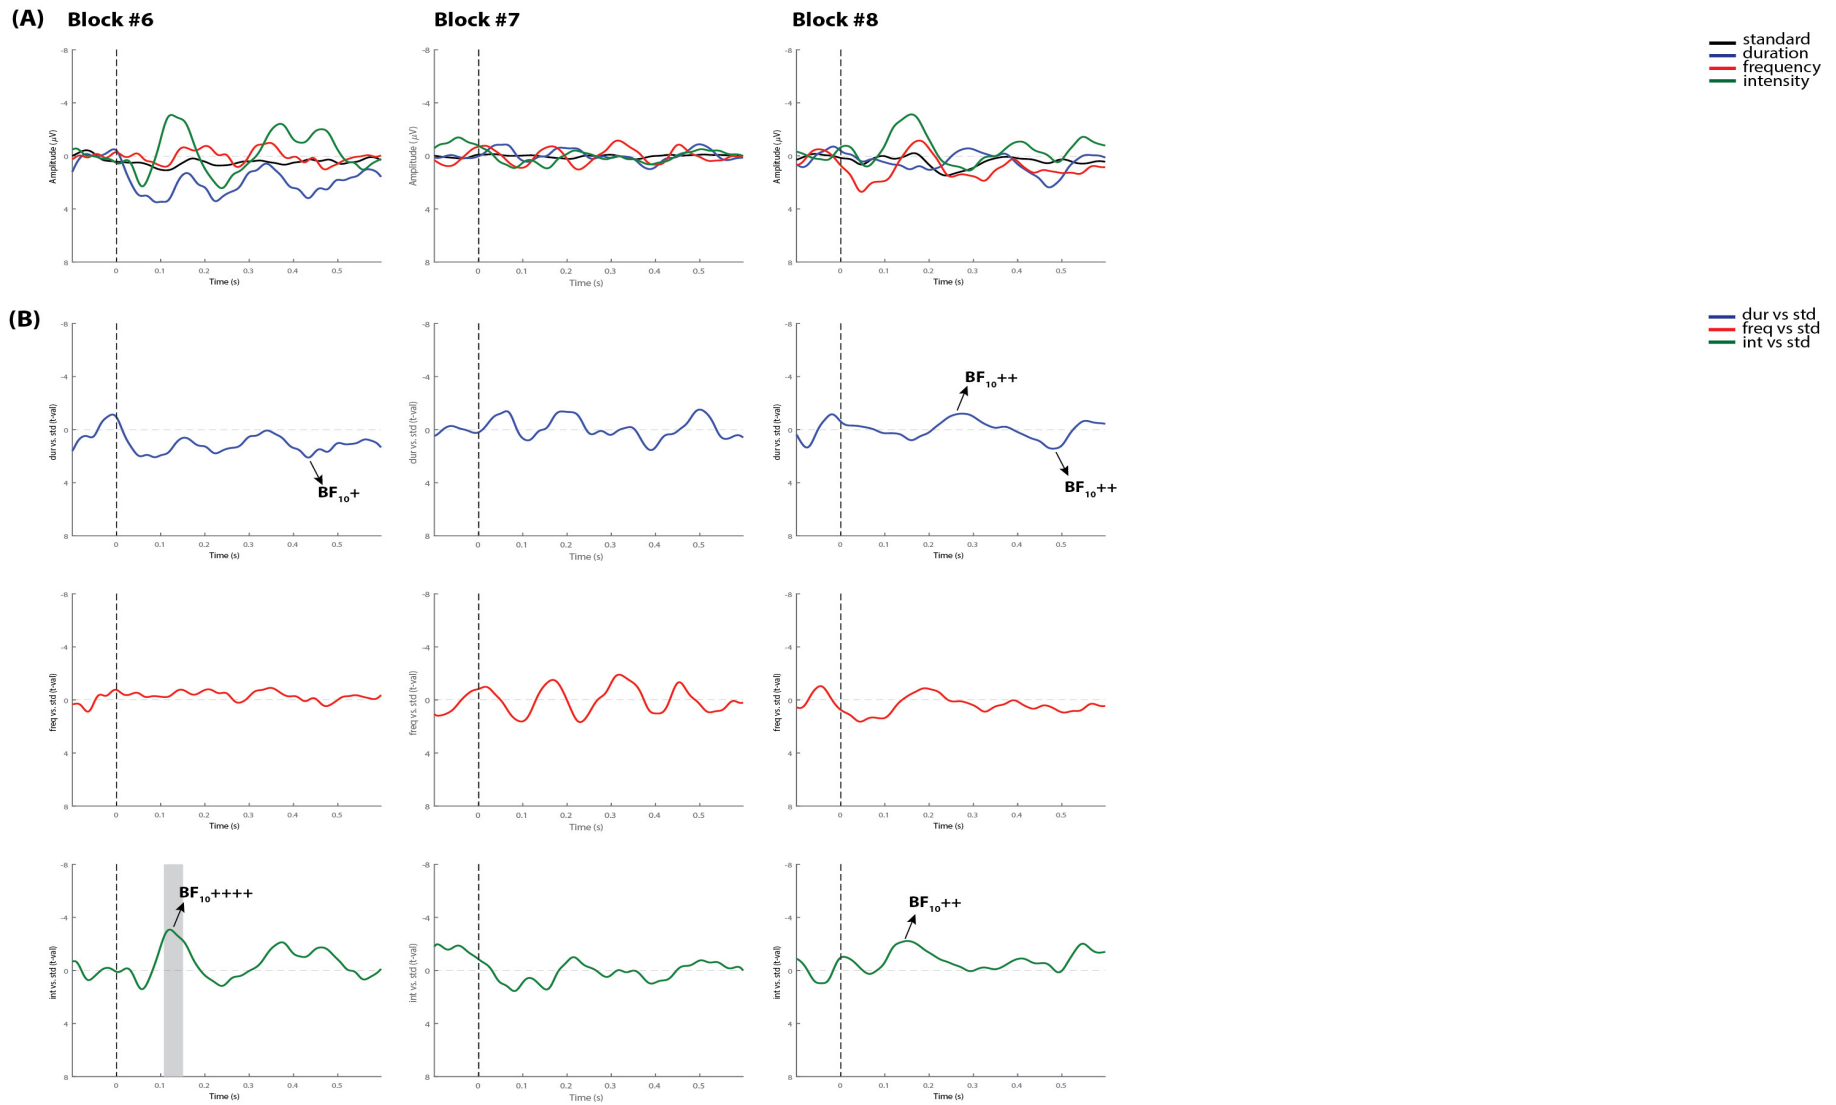

**Figure S2.** Individual ERPs and statistical findings of Patient 1 on day 0 (continuation). (A) Individual ERPs across blocks. (B) Time course of the difference between deviants and standard stimuli expressed in units of  $t$ -values. Significant intervals for negative components are denoted by a light gray area, and those for positive components are denoted by a dark gray area. Black arrows show the latency of maximum Bayes factors and the strength of evidence for  $H_1$ : + anecdotal; ++ moderate; +++ strong and ++++ very strong to extreme



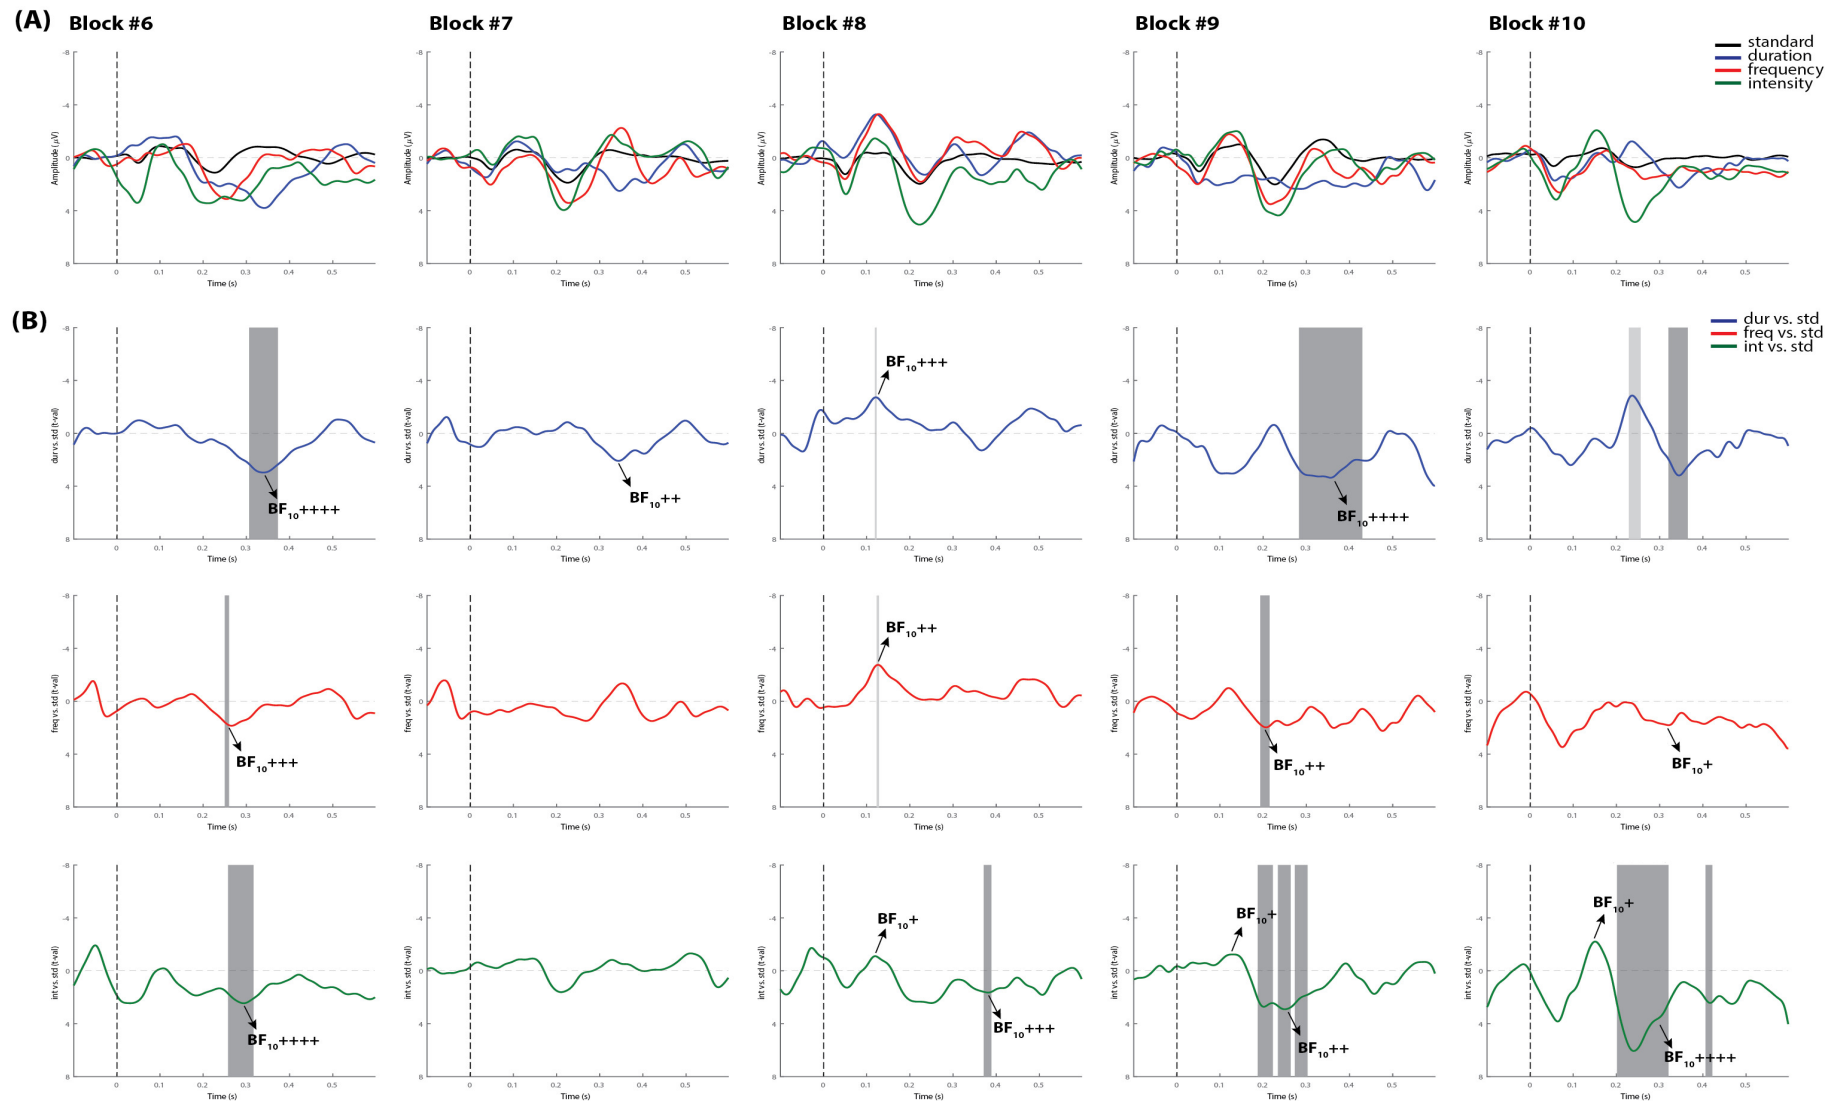

**Figure S4.** Individual ERPs and statistical findings of Patient 1 on day 3 (continuation). (A) Individual ERPs across blocks. (B) Time course of the difference between deviants and standard stimuli expressed in units of  $t$ -values. Significant intervals for negative components are denoted by a light gray area, and those for positive components are denoted by a dark gray area. Black arrows show the latency of maximum Bayes factors and the strength of evidence for  $H_1$ : + anecdotal; ++ moderate; +++ strong and ++++ very strong to extreme

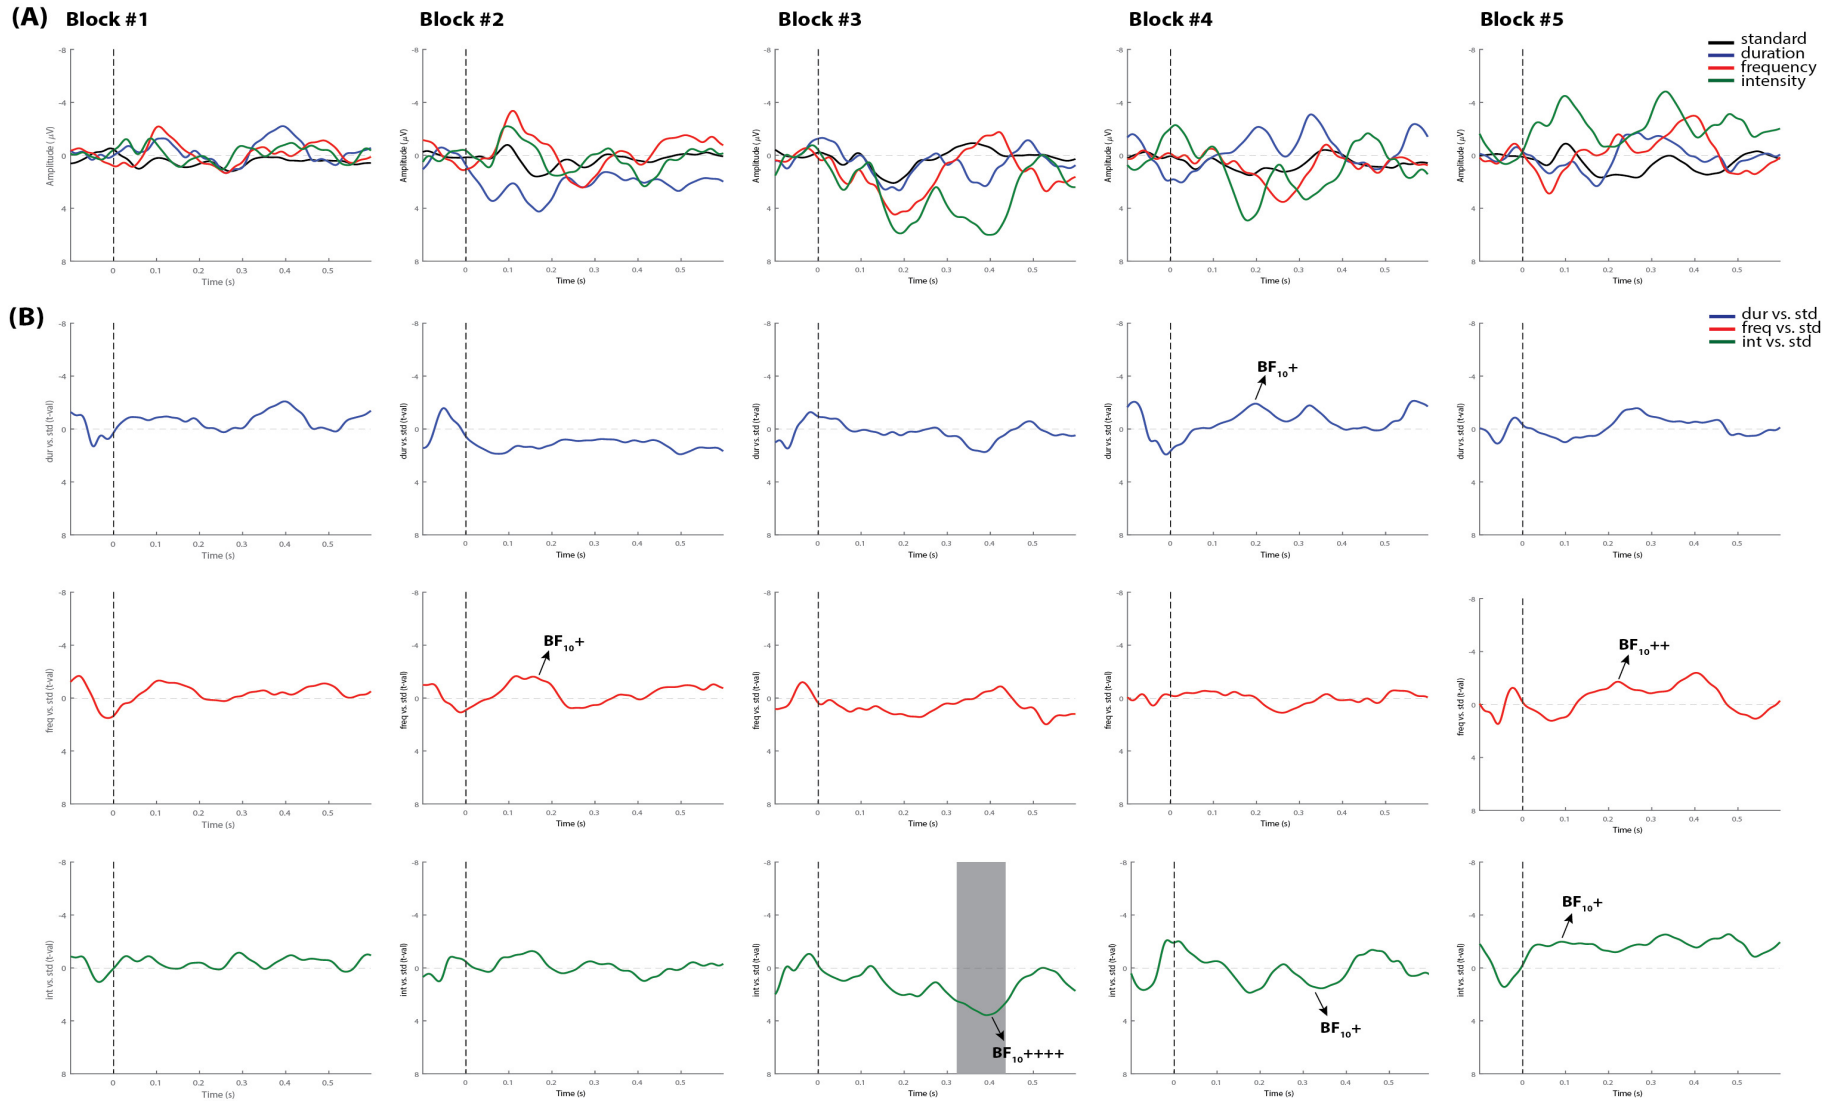

**Figure S5.** Individual ERPs and statistical findings of Patient 2 on day 0. (A) Individual ERPs across blocks. (B) Time course of the difference between deviants and standard stimuli expressed in units of  $t$ -values. Significant intervals for negative components are denoted by a light gray area, and those for positive components are denoted by a dark gray area. Black arrows show the latency of maximum Bayes factors and the strength of evidence for  $H1$ : + anecdotal; ++ moderate; +++ strong and ++++ very strong to extreme

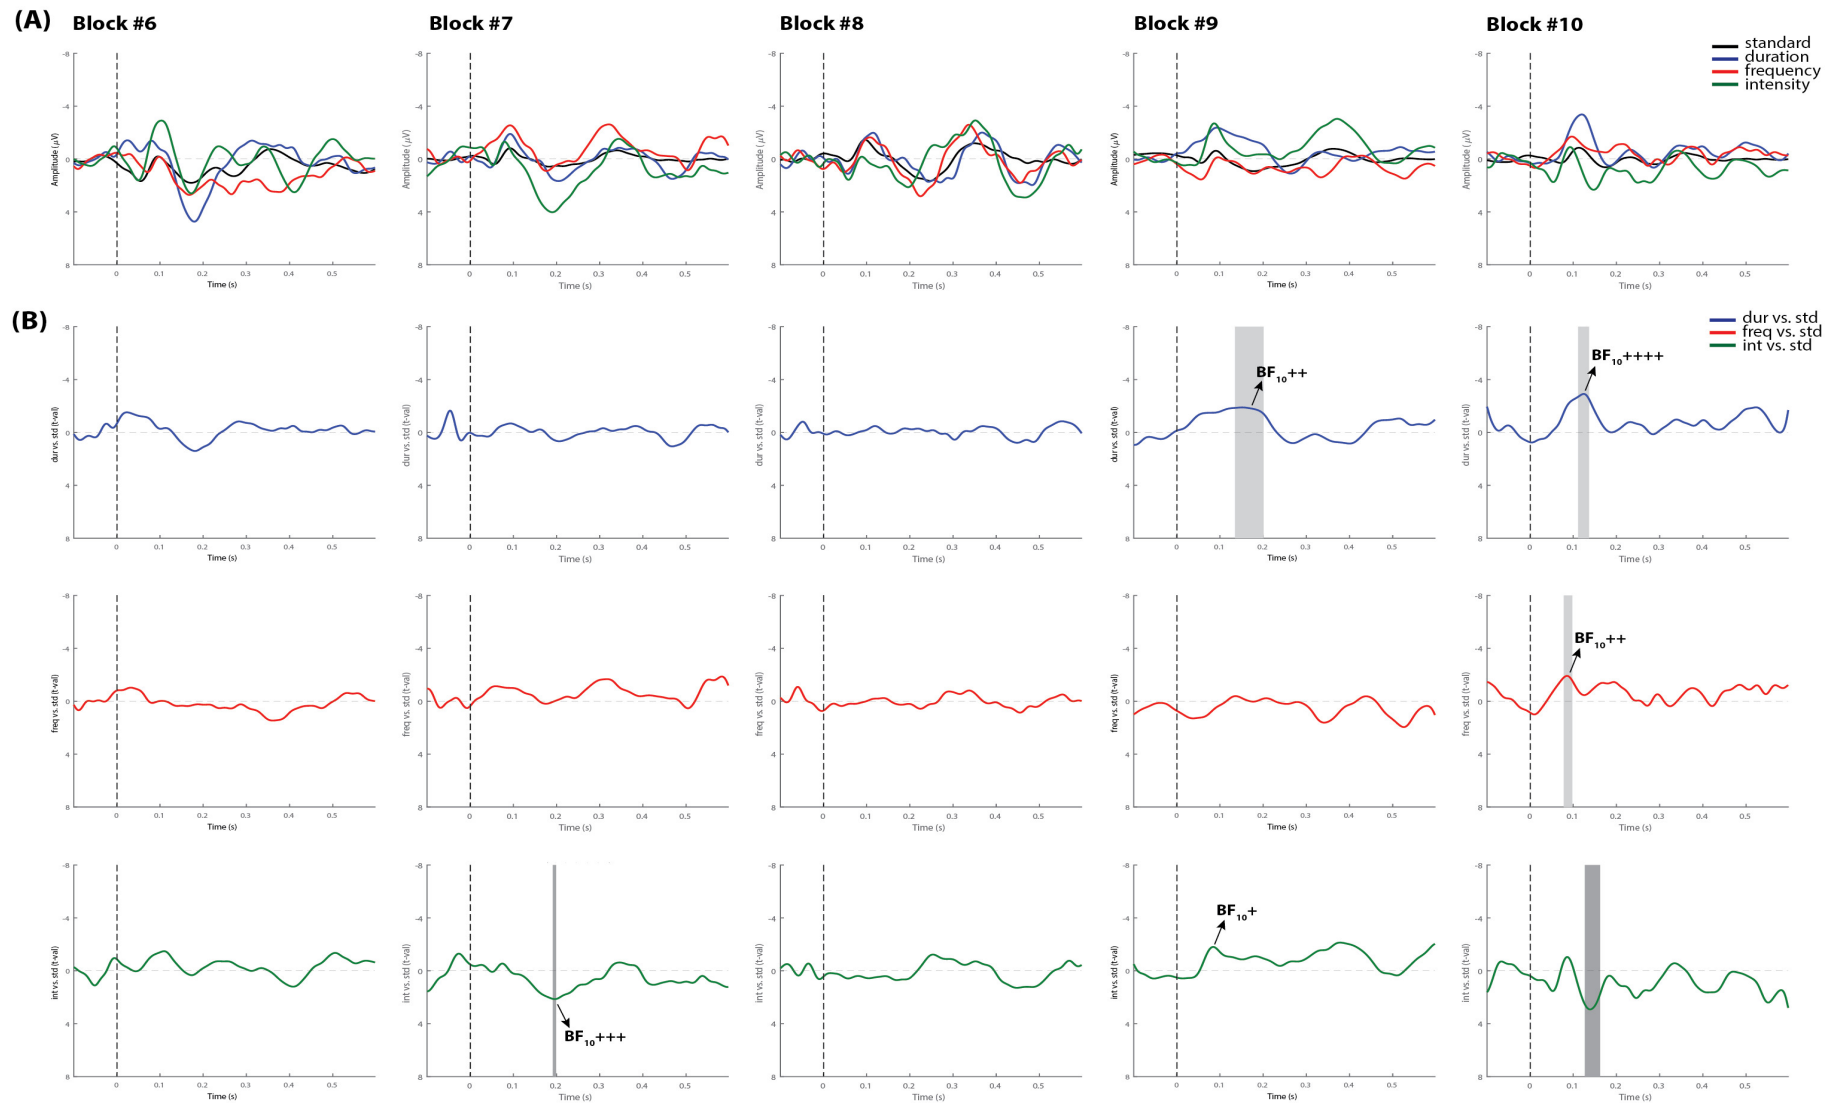

**Figure S6.** Individual ERPs and statistical findings of Patient 2 on day 0 (continuation). (A) Individual ERPs across blocks. (B) Time course of the difference between deviants and standard stimuli expressed in units of  $t$ -values. Significant intervals for negative components are denoted by a light gray area, and those for positive components are denoted by a dark gray area. Black arrows show the latency of maximum Bayes factors and the strength of evidence for  $H_1$ : + anecdotal; ++ moderate; +++ strong and ++++ very strong to extreme



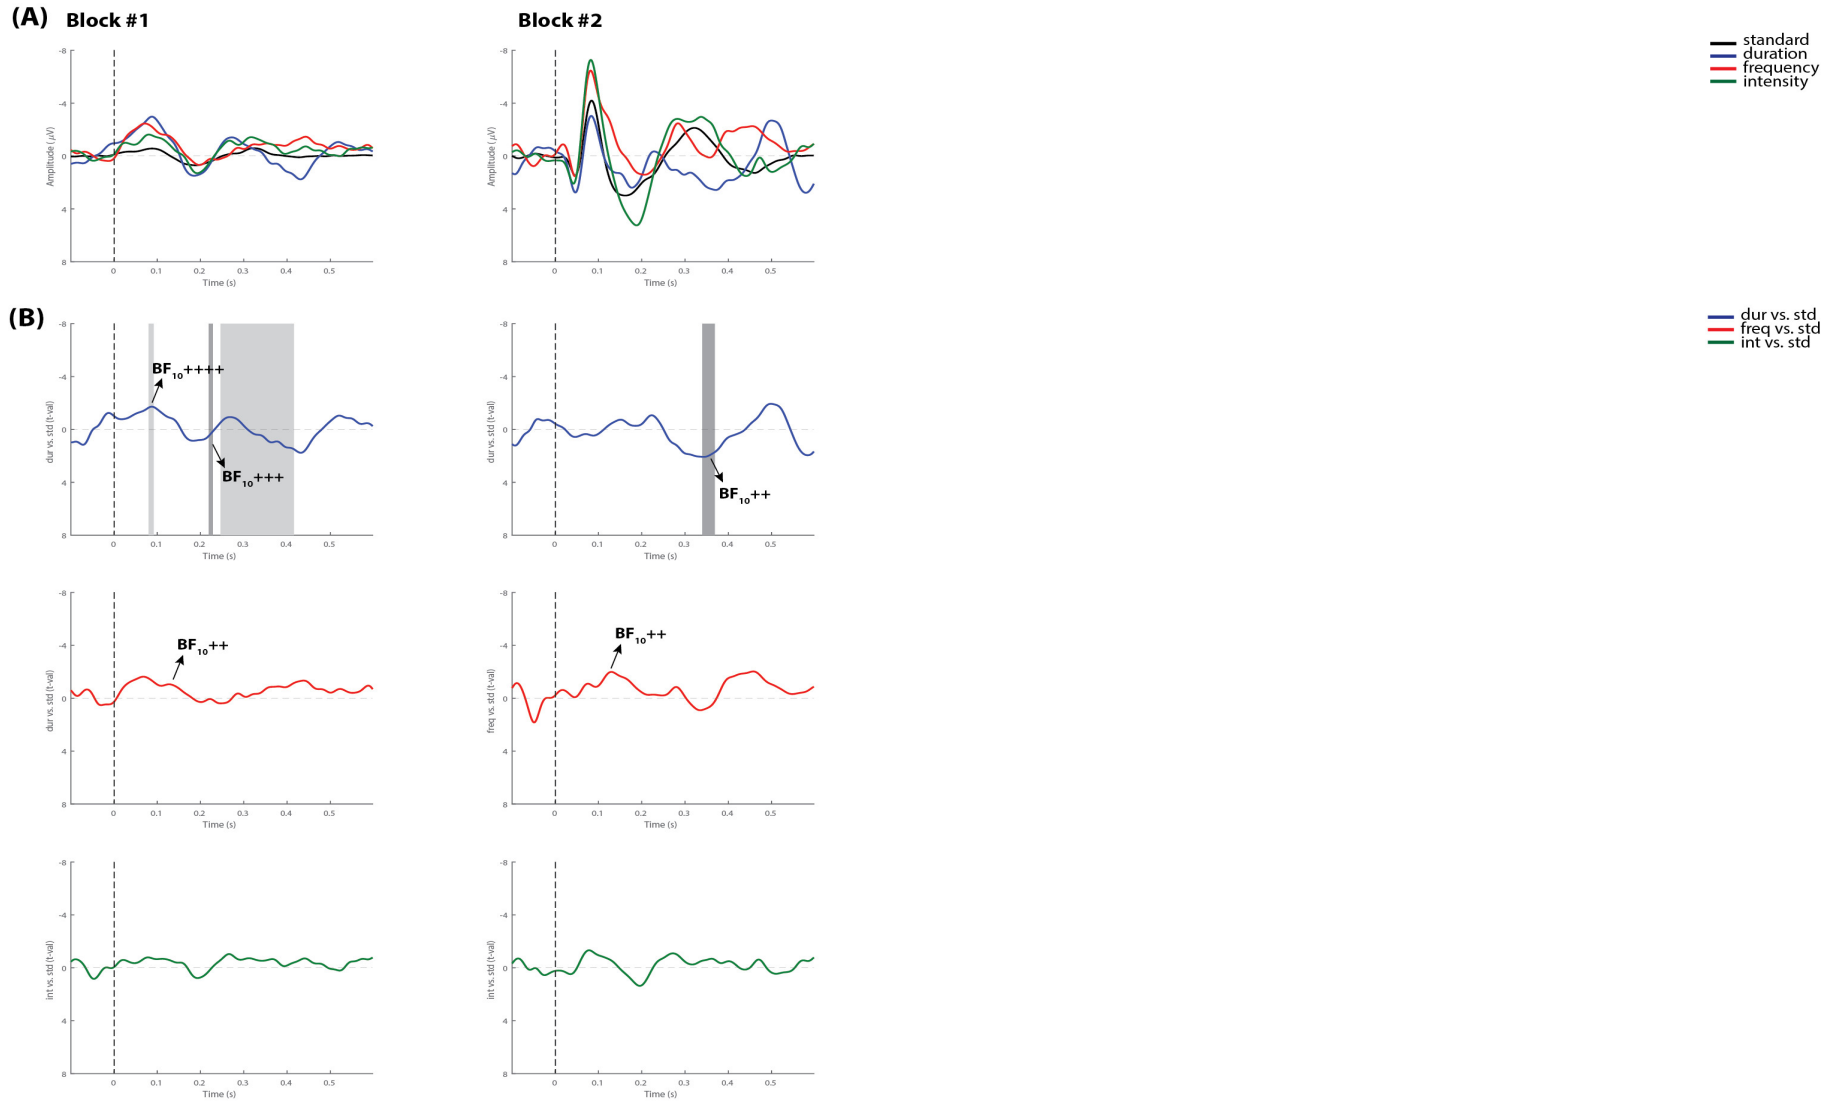

**Figure S7.** Individual ERPs and statistical findings of Patient 2 on day 3. (A) Individual ERPs across blocks. (B) Time course of the difference between deviants and standard stimuli expressed in units of  $t$ -values. Significant intervals for negative components are denoted by a light gray area, and those for positive components are denoted by a dark gray area. Black arrows show the latency of maximum Bayes factors and the strength of evidence for  $H1$ : + anecdotal; ++ moderate; +++ strong and ++++ very strong to extreme

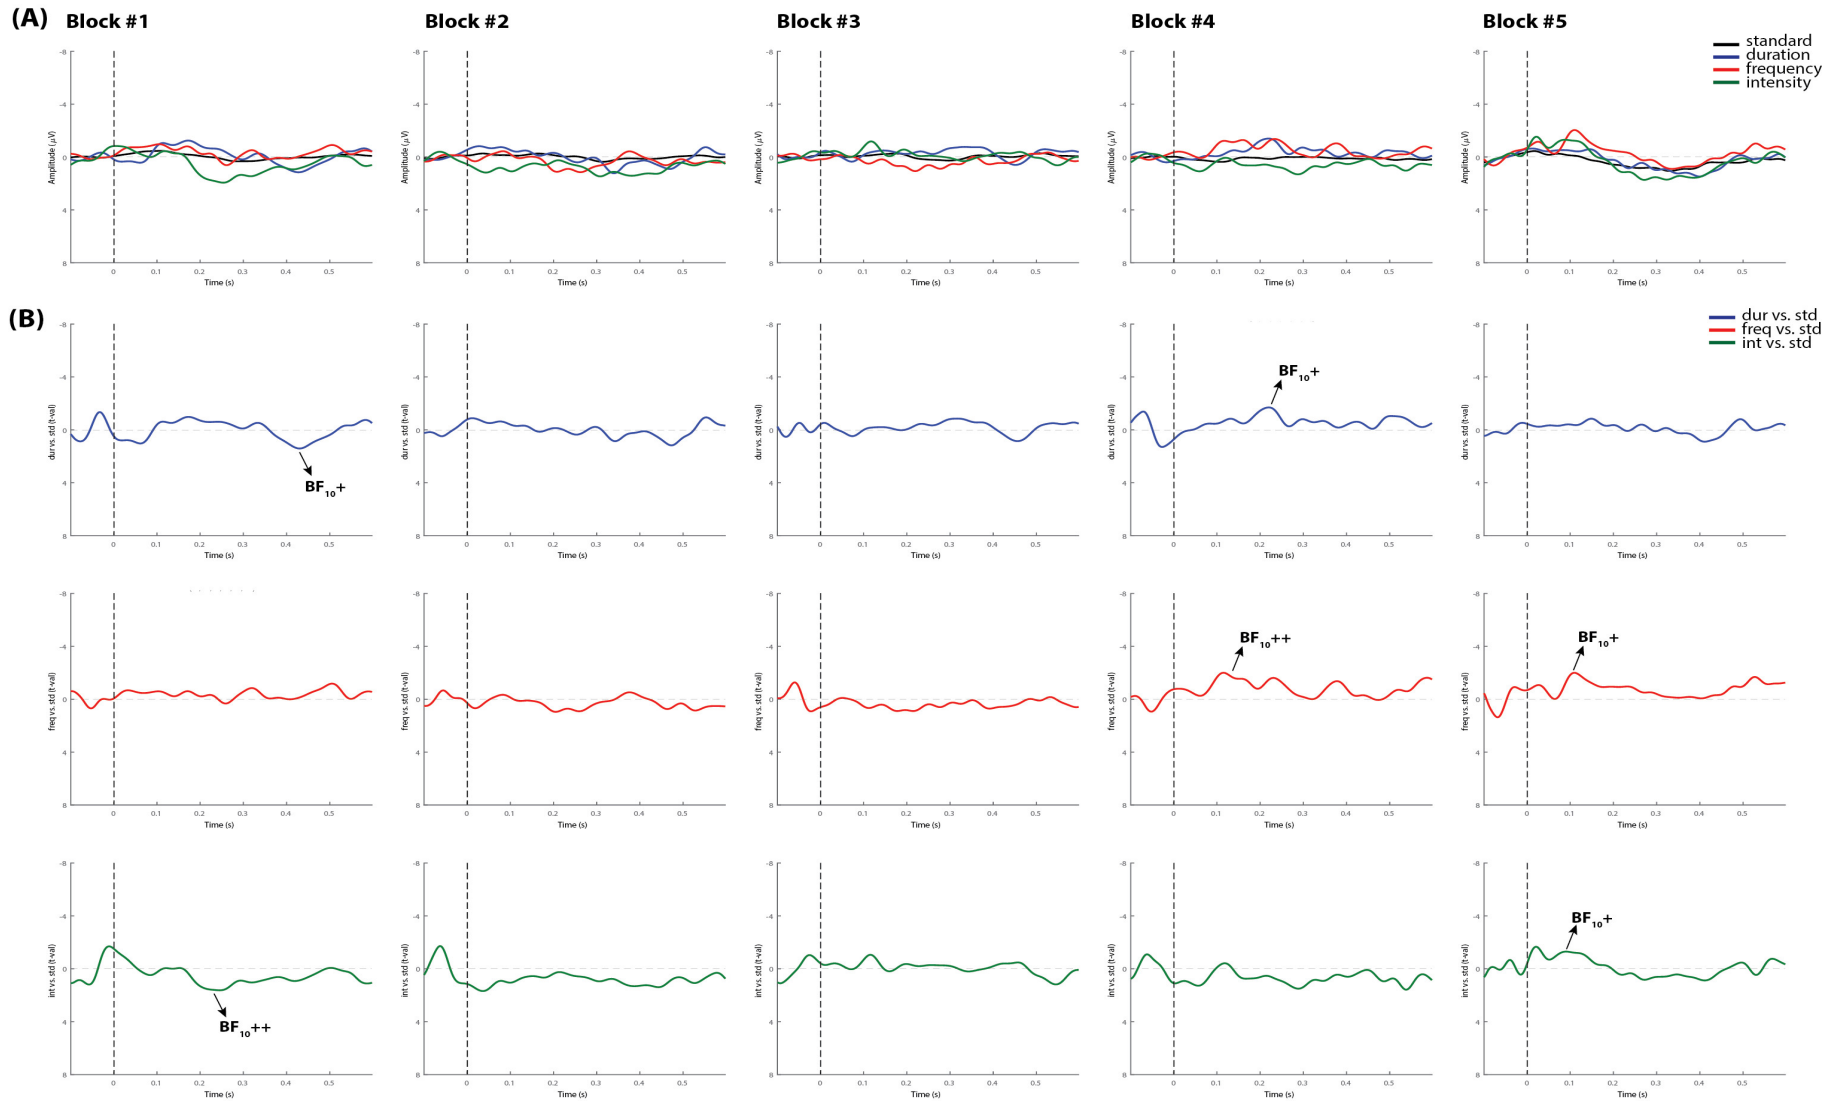

**Figure S8.** Individual ERPs and statistical findings of Patient 3 on day 0. (A) Individual ERPs across blocks. (B) Time course of the difference between deviants and standard stimuli expressed in units of  $t$ -values. Significant intervals for negative components are denoted by a light gray area, and those for positive components are denoted by a dark gray area. Black arrows show the latency of maximum Bayes factors and the strength of evidence for  $H1$ : + anecdotal; ++ moderate; +++ strong and ++++ very strong to extreme

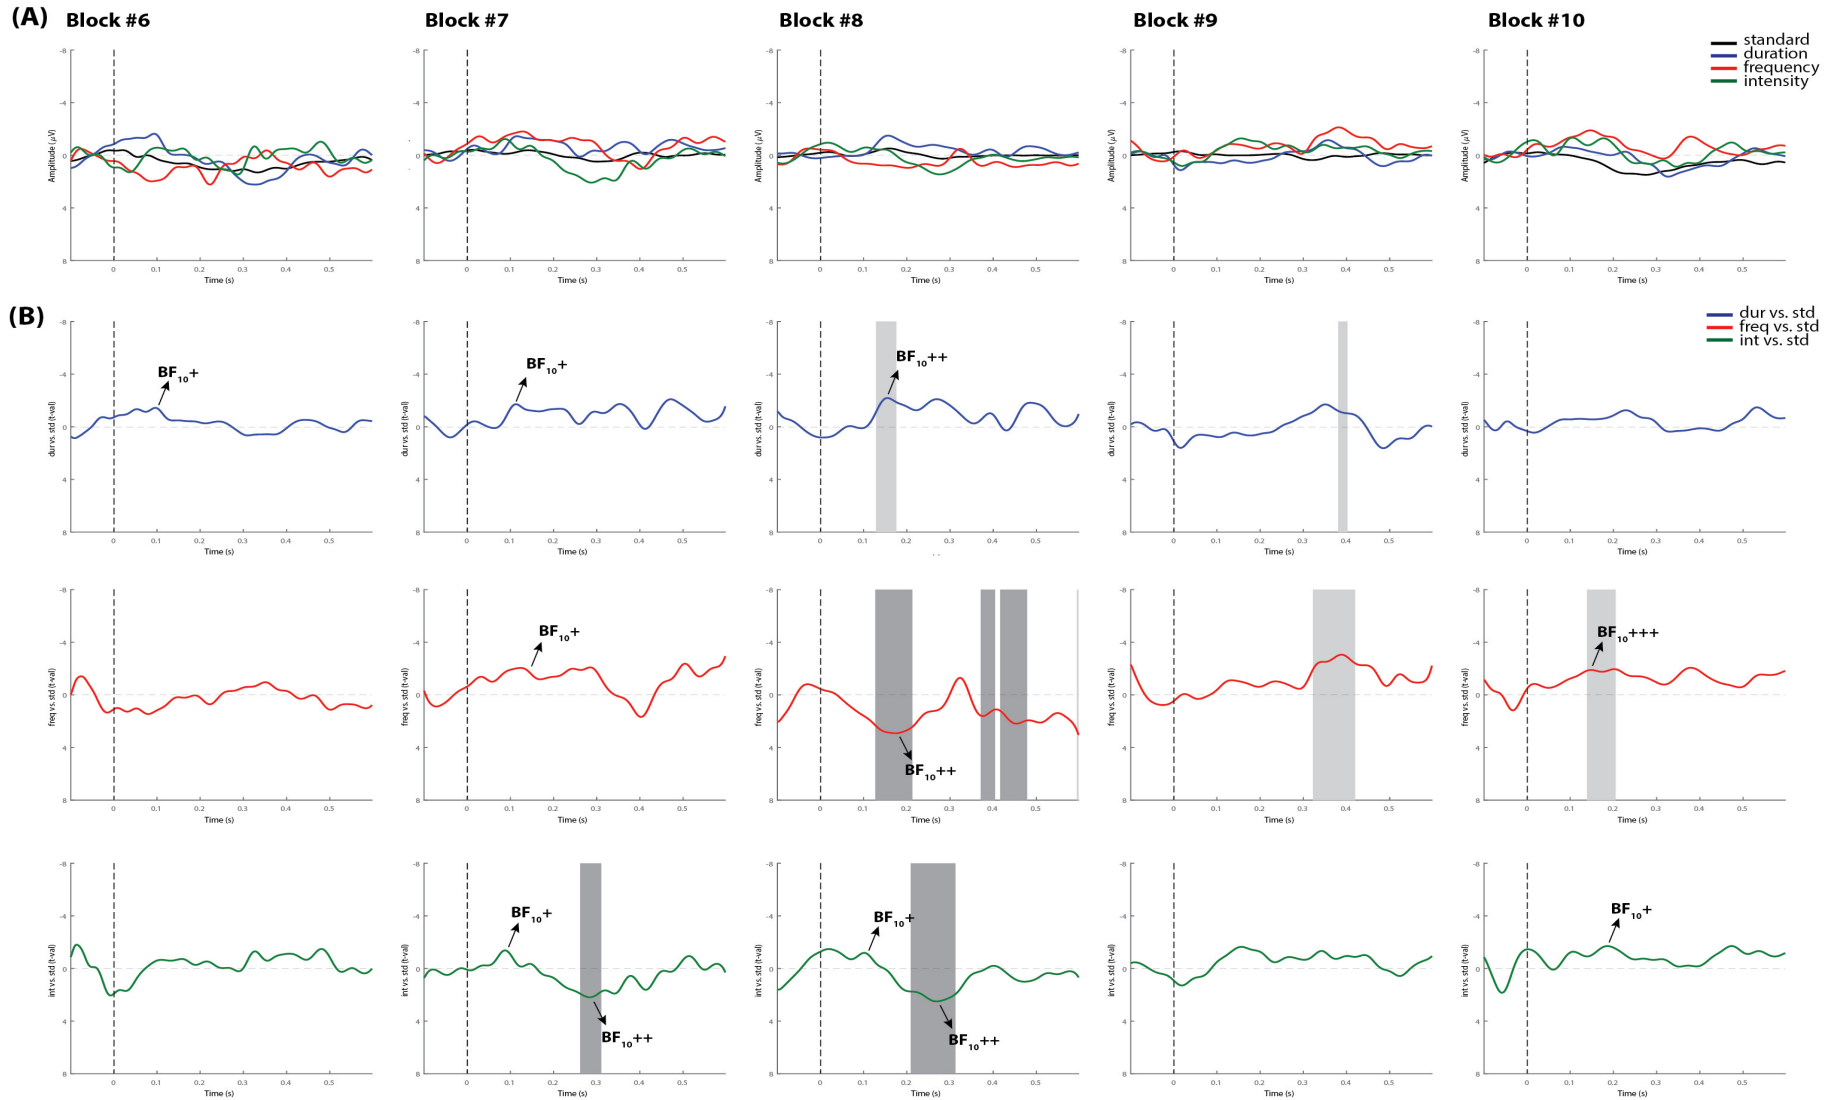

**Figure S9.** Individual ERPs and statistical findings of Patient 3 on day 0 (continuation). (A) Individual ERPs across blocks. (B) Time course of the difference between deviants and standard stimuli expressed in units of  $t$ -values. Significant intervals for negative components are denoted by a light gray area, and those for positive components are denoted by a dark gray area. Black arrows show the latency of maximum Bayes factors and the strength of evidence for  $H_1$ : + anecdotal; ++ moderate; +++ strong and ++++ very strong to extreme

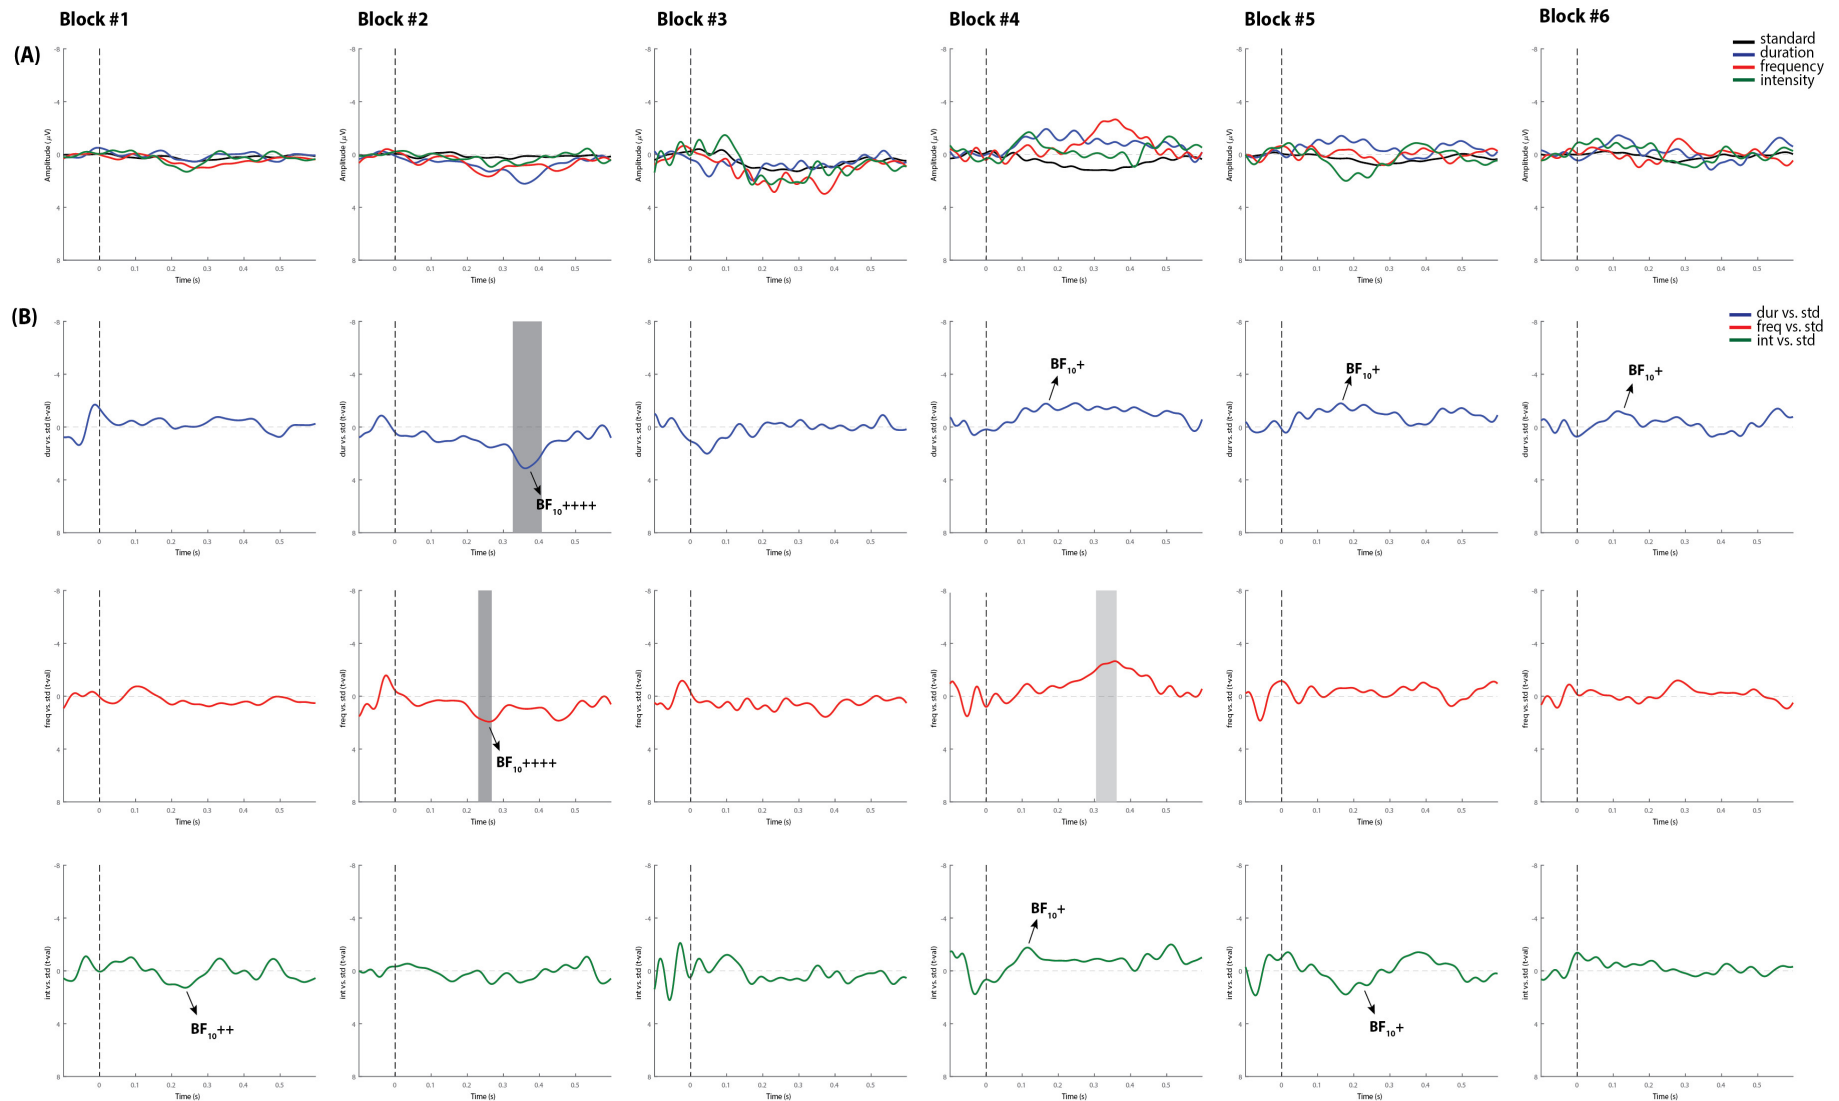

**Figure S10.** Individual ERPs and statistical findings of Patient 3 on day 3. (A) Individual ERPs across blocks. (B) Time course of the difference between deviants and standard stimuli expressed in units of  $t$ -values. Significant intervals for negative components are denoted by a light gray area, and those for positive components are denoted by a dark gray area. Black arrows show the latency of maximum Bayes factors and the strength of evidence for  $H1$ : + anecdotal; ++ moderate; +++ strong and ++++ very strong to extreme
